# Supplementary material
Source: Springer Nature journal article supplement (https://www.springermedizin.de/resource/supplementary/12960_2014_474_MOESM1_ESM.pdf/9570214)
Supplement: MOESM1 [file 9570214]

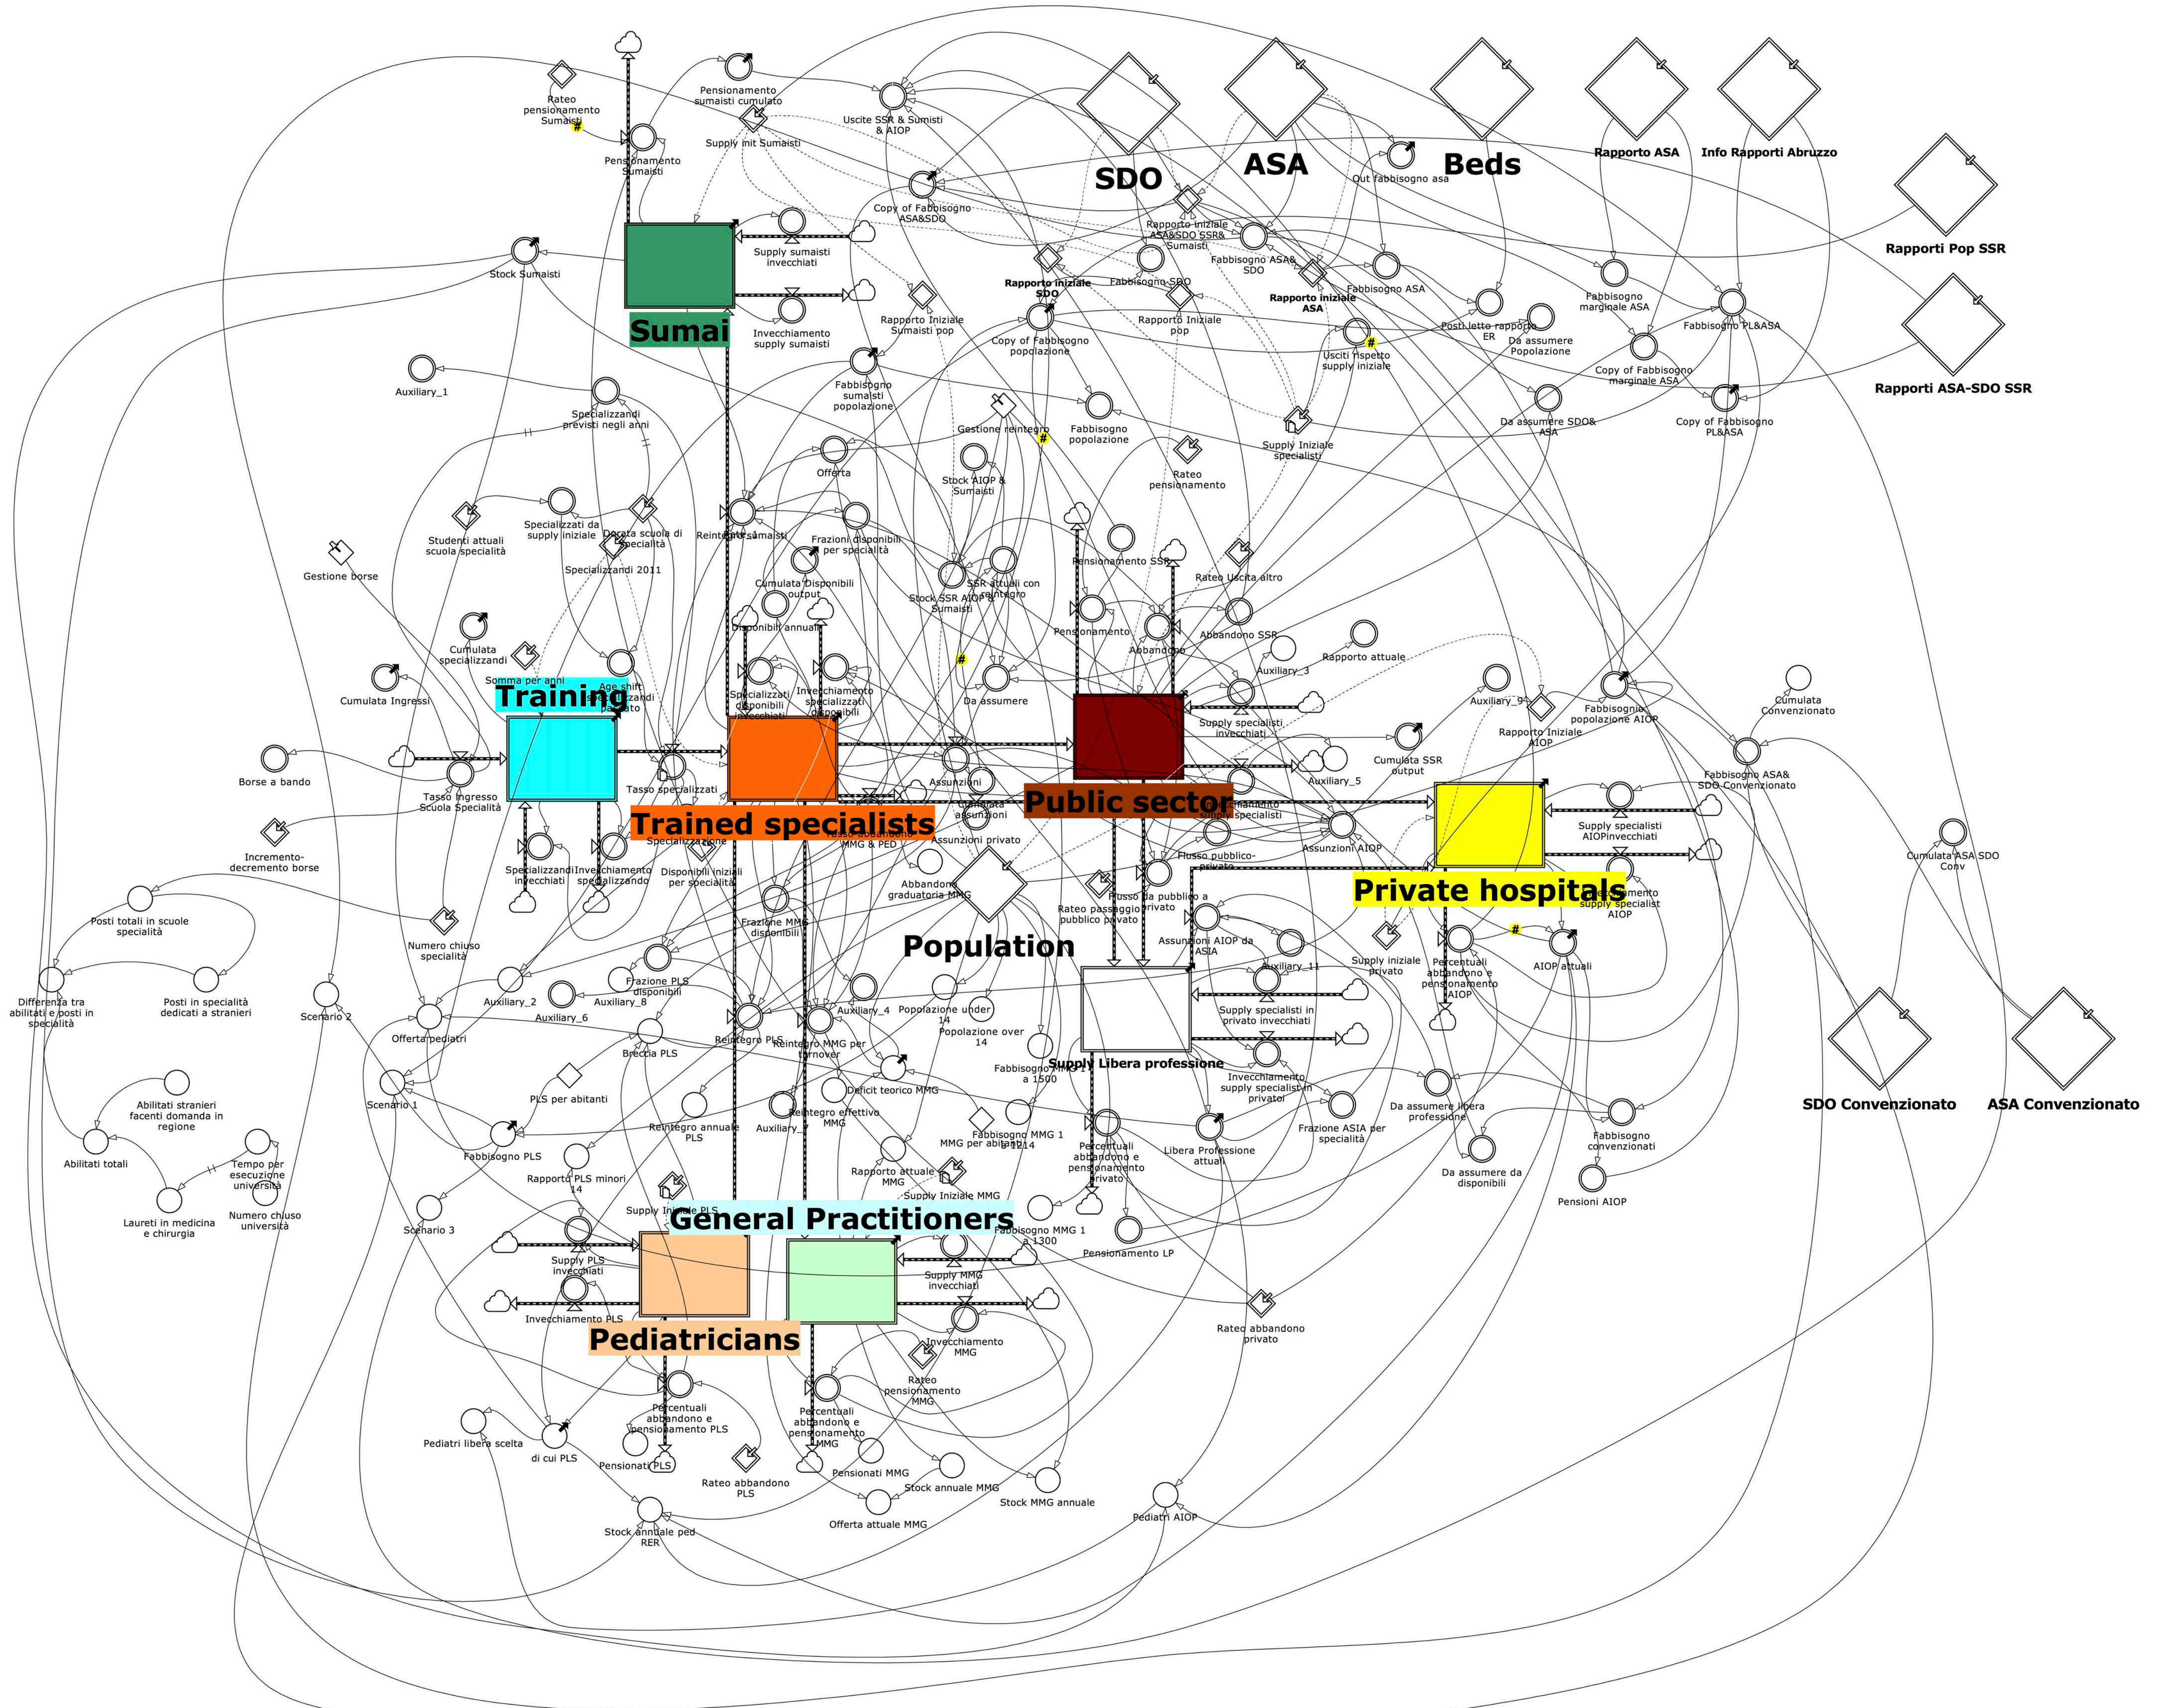

**Sumai**

**Training**

**Trained specialists**

**Public sector**

**Private hospitals**

**Population**

**General Practitioners**

**Pediatricians**

**SDO**

**ASA**

**Beds**

**Rapporto ASA**

**Info Rapporti Abruzzo**

**Rapporti Pop SSR**

**Rapporti ASA-SDO SSR**

**SDO Convenzionato**

**ASA Convenzionato**

**Supply Libera professione**

**Popolazione under 14**

**Popolazione over 14**

**Fabbisogno a 1500**

**MMG per abilitati**

**Fabbisogno MMG 1**

**MMG per abilitati**
